# Supplementary material for: Sepsis impairs microvascular autoregulation and delays capillary response within hypoxic capillaries
Source: Springer Nature journal article supplement (doi:10.1186/s13054-015-1102-7), 2015-11-04
Supplement: MOESM4 [file 9780816]

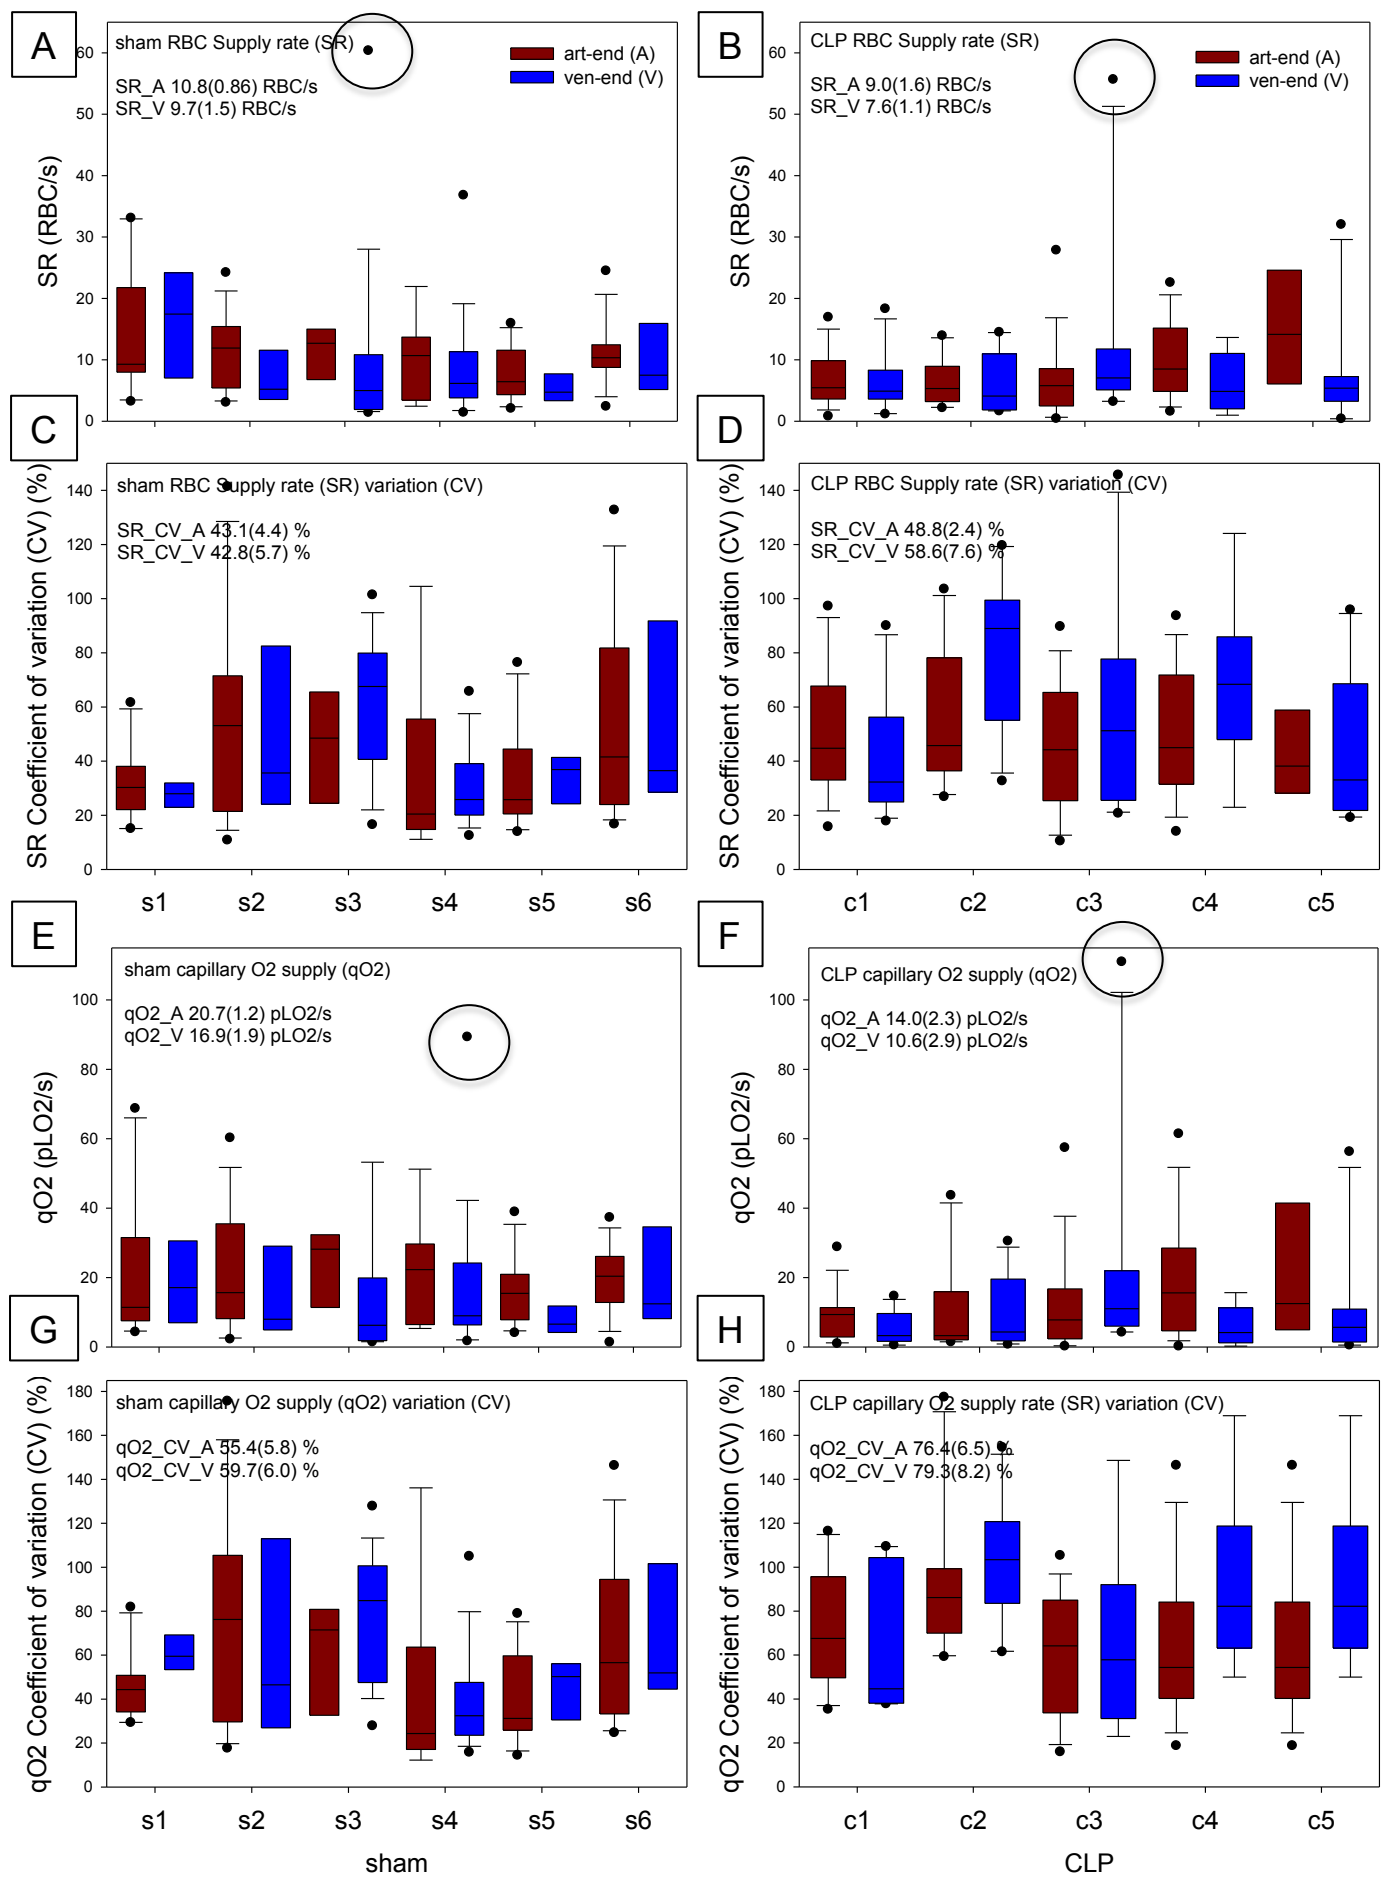

**Figure S3. RBC supply rate (SR) and capillary oxygen supply ( $qO_2$ ) heterogeneity.**

Sham RBC supply rates (SR) and capillary oxygen supply rates ( $qO_2$ ) and the respective variations (heterogeneity) in their 30-second profiles, are shown in column 1, panels A,C,E,G. Comparable CLP results are shown in column 2, panels B,D,F,H. Heterogeneity was calculated as the 30-second coefficient of variation (CV). Results are summarized in table 2. Note that extremely fast RBC SR and high capillary  $qO_2$  were detected in some experiments (see circled data points).
