# Supplementary material for: Sepsis impairs microvascular autoregulation and delays capillary response within hypoxic capillaries
Source: Springer Nature journal article supplement (doi:10.1186/s13054-015-1102-7), 2015-11-04
Supplement: MOESM5 [file 9780816]

Table S1. Control capillary RBC SR and  $qO_2$  95% confidence intervals

|                              | Art-end 95% CI | Ven-end 95% CI |
|------------------------------|----------------|----------------|
| SR (RBC/s)                   | 6.2 – 15.0     | 3.9 – 16.3     |
| $qO_2$ (pLO <sub>2</sub> /s) | 10.3 – 30.4    | 3.3 – 33.5     |

SR = capillary RBC supply rate.  $qO_2$  = capillary oxygen supply rate. Art-end = capillary arteriolar end. Ven-end = capillary venular-end. 95% CI = 95% confidence interval. Relative to these confidence limits, RBC supply rates (were categorized as either slow (below), average (within) or fast (above-95% CI); while, oxygen supply rates were categorized as either low (below), average (within) or high (above-95% CI).
